# Supplementary material for: Spatial Variability and Periodicity of Precipitation in the Middle Reaches of the Yellow River, China
Source: Hindawi journal article supplement (doi:10.1155/2016/9451614), 2015-12-27
Supplement: f1 [file 9451614.f1.docx]

**Supplementary Material for manuscript “Spatial variability and periodicity of precipitation in the middle reaches of the Yellow River, China”**

Note: Table S1 and Table S2 are used to illustrate present trends of precipitation by linear fitting for the 26 stations in flood season and main flood season.

Table S1 Present trends of precipitation for the 26 stations in flood season during 1958–2013.

| Station (Abbr.) | Linear fitting |
| --- | --- |
| Youyu (YY) | y=-0.839x+2008 |
| Hequ (HQ) | y=-1.539x+3392 |
| Wuzhai (WZ) | y=-0.425x+1224 |
| Xingxian (XX) | y=-0.948x+2276 |
| Yulin (YL) | y=-0.596x+1511 |
| Taiyuan (TY) | y=-0.670x+1684 |
| Hengshan (HS) | y=-1.044x+2373 |
| Suide (SD) | y=-1.159x+2665 |
| Lishi (LS) | y=-0.911x+2202 |
| Jiexiu (JX) | y=-0.654x+1665 |
| Wuqi (WQ) | y=-0.813x+1988 |
| Yan’an (YA) | y=-1.096x+2605 |
| Xixian (XX) | y=-1.860x+4107 |
| Linfen (LF) | y=-1.540x+3431 |
| Huanxian (HX) | y=-0.976x+2277 |
| Luochuan (LC) | y=-0.098x+652.2 |
| Yuncheng (YC) | y=-0.824x+2020 |
| Xiji (XJ) | y=-1.380x+3062 |
| Pingliang (PL) | y=-0.483x+1351 |
| Xifeng (XF) | y=-0.393x+1195 |
| Changwu (CW) | y=0.131x+164.2 |
| Tongchuan (TC) | y=-0.626x+1675 |
| Tianshui (TS) | y=-0.672x+1722 |
| Baoji (BJ) | y=-0.735x+1936 |
| Wugong (WG) | y=-0.062x+546.5 |
| Xi’an (XA) | y=-0.021x+422.4 |

Table S2 Present trends of precipitation for the 26 stations in main flood season during 1958–2013.

| Station (Abbr.) | Linear fitting |
| --- | --- |
| Youyu (YY) | y=-0.822x+1842 |
| Hequ (HQ) | y=-1.315x+2821 |
| Wuzhai (WZ) | y=-0.789x+1790 |
| Xingxian (XX) | y=-1.215x+2648 |
| Yulin (YL) | y=-0.803x+1800 |
| Taiyuan (TY) | y=-0.774x+1748 |
| Hengshan (HS) | y=-1.340x+2833 |
| Suide (SD) | y=-0.739x+1674 |
| Lishi (LS) | y=-0.816x+1847 |
| Jiexiu (JX) | y=-0.232x+672.9 |
| Wuqi (WQ) | y=-0.706x+1617 |
| Yan’an (YA) | y=-0.572x+1379 |
| Xixian (XX) | y=-0.848x+1920 |
| Linfen (LF) | y=-0.959x+2121 |
| Huanxian (HX) | y=-0.772x+1723 |
| Luochuan (LC) | y=0.009x+231.1 |
| Yuncheng (YC) | y=-0.379x+943.4 |
| Xiji (XJ) | y=-1.184x+2526 |
| Pingliang (PL) | y=-0.387x+980.8 |
| Xifeng (XF) | y=-0.015x+251.2 |
| Changwu (CW) | y=0.293x-365.7 |
| Tongchuan (TC) | y=-0.308x+841 |
| Tianshui (TS) | y=-0.161x+507.4 |
| Baoji (BJ) | y=0.040x+146 |
| Wugong (WG) | y=0.172x-144.6 |
| Xi’an (XA) | y=0.599x-1021 |
